# Supplementary material for: Anticitrullinated protein antibodies facilitate migration of synovial tissue-derived fibroblasts
Source: PubMed Central journal article supplement (PMC6900251; doi:10.1136/annrheumdis-2018-214967), 2019-09-03

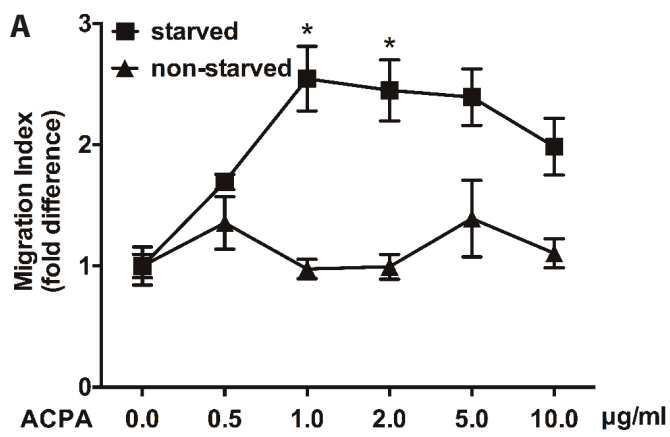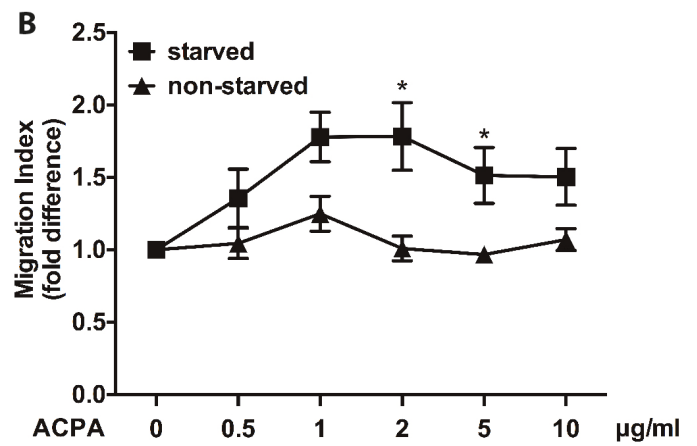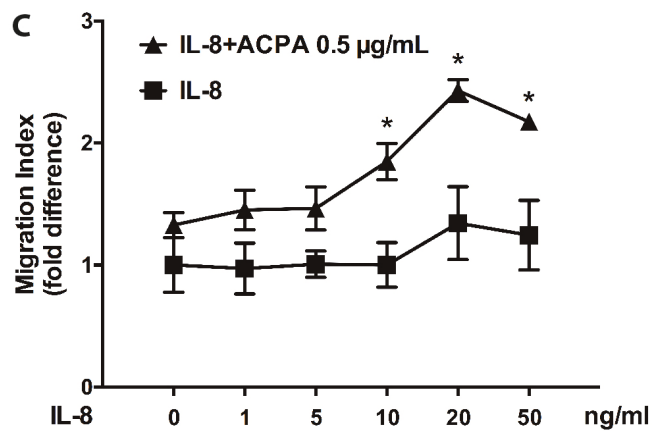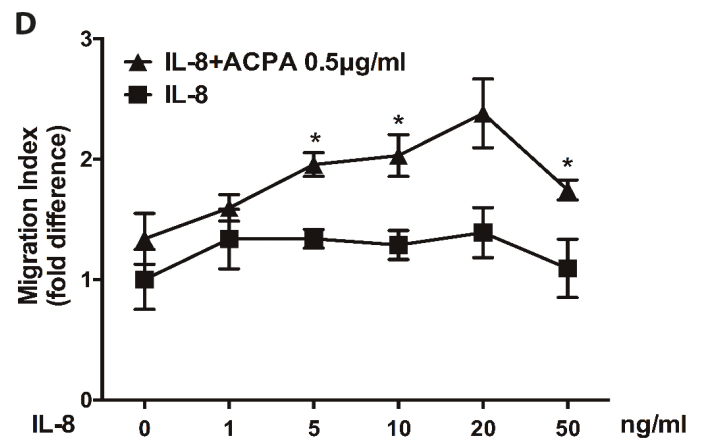

Supplement: annrheumdis-2018-214967supp003.pdf [file annrheumdis-2018-214967supp003.pdf]
