# Supplementary material for: Anticitrullinated protein antibodies facilitate migration of synovial tissue-derived fibroblasts
Source: PubMed Central journal article supplement (PMC6900251; doi:10.1136/annrheumdis-2018-214967), 2019-09-03
Supplement: annrheumdis-2018-214967supp006.pdf [file annrheumdis-2018-214967supp006.pdf]

| <b>Figure 2A</b> |         | <b>Intensity (Mean <math>\pm</math> SD)</b> | <b>P value</b> |
|------------------|---------|---------------------------------------------|----------------|
| PAD2             | NC      | 3.131 $\pm$ 5.237                           | < 0.0001       |
|                  | Starved | 93.21 $\pm$ 53.53                           |                |
| PAD4             | NC      | 0.2729 $\pm$ 0.1649                         | < 0.0001       |
|                  | Starved | 144.3 $\pm$ 42.71                           |                |
| ACPA             | NC      | 5.370 $\pm$ 0.9712                          | < 0.0001       |
|                  | Starved | 143.9 $\pm$ 42.46                           |                |

| <b>Figure 4H and G</b> |         | <b>Intensity (Mean <math>\pm</math> SD)</b> | <b>P value</b> |
|------------------------|---------|---------------------------------------------|----------------|
| PAD2                   | NC      | 6.352 $\pm$ 4.198                           | -              |
|                        | Starved | 111.7 $\pm$ 46.74                           | < 0.0001       |
|                        | IL-8    | 124.0 $\pm$ 50.46                           | < 0.0001       |
| PAD4                   | NC      | 4.995 $\pm$ 4.536                           | -              |
|                        | Starved | 152.5 $\pm$ 43.81                           | < 0.0001       |
|                        | IL-8    | 130.5 $\pm$ 49.16                           | < 0.0001       |
| ACPA                   | NC      | 3.473 $\pm$ 2.871                           | -              |
|                        | Starved | 92.19 $\pm$ 48.03                           | < 0.0001       |
|                        | IL-8    | 90.37 $\pm$ 46.41                           | < 0.0001       |

Each group contains intensity values from 3 representative fields (images) containing at least 150 cells in total.
